# Supplementary material
Source: PubMed Central journal article supplement (PMC9339483)
Supplement: NIHMS1801967-supplement-Supplemental_Publication_Material.pdf [file NIHMS1801967-supplement-Supplemental_Publication_Material.pdf]

## SUPPLEMENTAL MATERIAL

### Aging alters the aortic proteome in health and thoracic aortic aneurysm

Daniel J. Tyrrell<sup>1</sup>, Judy Chen<sup>1,2</sup>, Benjamin Y. Li<sup>1</sup>, Sherri C. Wood<sup>1</sup>, Wendy Rosebury-Smith<sup>3</sup>,  
Henriette A. Remmer<sup>4</sup>, Longtan Jiang<sup>5</sup>, Min Zhang<sup>6</sup>, Morgan Salmon<sup>5</sup>, Gorav Ailawadi<sup>5</sup>, Bo  
Yang<sup>5</sup>, Daniel R. Goldstein<sup>1,2,7</sup>

- 1: Department of Internal Medicine, University of Michigan, USA
- 2: Program on Immunology, University of Michigan, USA
- 3: Unit for Laboratory Animal Management, University of Michigan, USA
- 4: Proteomics & Peptide Synthesis Core, University of Michigan, USA
- 5: Department of Cardiac Surgery, University of Michigan, USA
- 6: Department of Biostatistics, University of Michigan, USA
- 7: Department of Microbiology and Immunology, University of Michigan, USA

Major Resources Table

| Target          | Vendor or Source          | Catalog # | Working concentration | Persistent ID / URL                                                                                                                                                                                                 |
|-----------------|---------------------------|-----------|-----------------------|---------------------------------------------------------------------------------------------------------------------------------------------------------------------------------------------------------------------|
| Parkin          | Abcam                     | Ab77924   | 1 µg/mL               | <a href="https://www.abcam.com/parkin-antibody-prk8-ab77924.html">https://www.abcam.com/parkin-antibody-prk8-ab77924.html</a>                                                                                       |
| PGC1α           | Abcam                     | Ab54481   | 1 µg/mL               | <a href="https://www.abcam.com/pgc1-alpha-antibody-bsa-and-azide-free-ab54481.html">https://www.abcam.com/pgc1-alpha-antibody-bsa-and-azide-free-ab54481.html</a>                                                   |
| STING           | Cell Signaling Technology | 13647     | 0.06 µg/mL            | <a href="https://www.cellsignal.com/products/primary-antibodies/sting-d2p2f-rabbit-mab/13647">https://www.cellsignal.com/products/primary-antibodies/sting-d2p2f-rabbit-mab/13647</a>                               |
| Phospho-STING   | Cell Signaling Technology | 19781     | 0.05 µg/mL            | <a href="https://www.cellsignal.com/products/primary-antibodies/phospho-sting-ser366-d7c3s-rabbit-mab/19781">https://www.cellsignal.com/products/primary-antibodies/phospho-sting-ser366-d7c3s-rabbit-mab/19781</a> |
| TLR9            | Santa Cruz                | 52966     | 0.5 µg/mL             | <a href="https://www.scbt.com/p/tlr9-antibody-26c593">https://www.scbt.com/p/tlr9-antibody-26c593</a>                                                                                                               |
| IFNβ            | Cell Signaling Technology | 73671     | 1 µg/mL               | <a href="https://www.cellsignal.com/products/primary-antibodies/ifn-b1-d1d7g-rabbit-mab/73671">https://www.cellsignal.com/products/primary-antibodies/ifn-b1-d1d7g-rabbit-mab/73671</a>                             |
| LGALS9          | Cell Signaling Technology | 54330S    | 0.1 µg/mL             | <a href="https://www.cellsignal.com/products/primary-antibodies/galectin-9-d9r4a-xp-rabbit-mab/54330">https://www.cellsignal.com/products/primary-antibodies/galectin-9-d9r4a-xp-rabbit-mab/54330</a>               |
| PHB2            | Cell Signaling Technology | 14085     | 0.1 µg/mL             | <a href="https://www.cellsignal.com/products/primary-antibodies/phb2-e1z5a-rabbit-mab/14085">https://www.cellsignal.com/products/primary-antibodies/phb2-e1z5a-rabbit-mab/14085</a>                                 |
| CDH13           | Abcam                     | ABT121    | 2 µg/mL               | <a href="https://www.sigmaaldrich.com/US/20en/product/mm/abt121">https://www.sigmaaldrich.com/US/20en/product/mm/abt121</a>                                                                                         |
| ORM2            | ThermoFisher Scientific   | PA5-37124 | 1 µg/mL               | <a href="https://www.thermofisher.com/antibody/product/ORM2-Antibody-Polyclonal/PA5-37124">https://www.thermofisher.com/antibody/product/ORM2-Antibody-Polyclonal/PA5-37124</a>                                     |
| ACTBL2          | ThermoFisher Scientific   | PA5-72402 | 1 µg/mL               | <a href="https://www.thermofisher.com/antibody/product/ACTBL2-Antibody-Polyclonal/PA5-72402">https://www.thermofisher.com/antibody/product/ACTBL2-Antibody-Polyclonal/PA5-72402</a>                                 |
| MGST1           | Abcam                     | Ab131059  | 1 µg/mL               | <a href="https://www.abcam.com/mgst1-antibody-epr7934-ab131059.html">https://www.abcam.com/mgst1-antibody-epr7934-ab131059.html</a>                                                                                 |
| β-Actin         | Abcam                     | Ab8226    | 0.5 µg/mL             | <a href="https://www.abcam.com/beta-actin-antibody-mabcam-8226-loading-control-ab8226.html">https://www.abcam.com/beta-actin-antibody-mabcam-8226-loading-control-ab8226.html</a>                                   |
| Anti-Rabbit HRP | Abcam                     | Ab205718  | 0.2 µg/mL             | <a href="https://www.abcam.com/goat-rabbit-igg-hl-hrp-ab205718.html">https://www.abcam.com/goat-rabbit-igg-hl-hrp-ab205718.html</a>                                                                                 |
| Anti-Mouse HRP  | Abcam                     | Ab205719  | 0.2 µg/mL             | <a href="https://www.abcam.com/goat-mouse-igg-hl-hrp-ab205719.html">https://www.abcam.com/goat-mouse-igg-hl-hrp-ab205719.html</a>                                                                                   |
| Anti-rodent HRP | Biocare                   | RMR622    | N/A                   | <a href="https://biocare.net/product/rabbit-on-rodent-hrp-polymer/">https://biocare.net/product/rabbit-on-rodent-hrp-polymer/</a>                                                                                   |

Supplemental Tables  
Table S1

|                                   | Young<br>Healthy | Aged<br>Healthy | Young<br>TAA | Aged<br>TAA                  |
|-----------------------------------|------------------|-----------------|--------------|------------------------------|
| <b>N</b>                          | 4                | 4               | 4            | 4                            |
| <b>Age, mean (SD)</b>             | 32.75 (6.34)     | 66.25 (2.99)**  | 46.5 (7.55)* | 64.75 (5.19) <sup>\$.#</sup> |
| <b>Female, n (%)</b>              | 0 (0)            | 0 (0)           | 0 (0)        | 0 (0)                        |
| <b>Aneurysm diameter, mm (SD)</b> | N/A              | N/A             | 49.25 (4.35) | 45.75 (6.99) <sup>†</sup>    |
| <b>Comorbidities</b>              |                  |                 |              |                              |
| <b>BAV, n (%)</b>                 | N/A              | N/A             | 4 (100)      | 4 (100) <sup>†</sup>         |
| <b>CKD n, (%)</b>                 | N/A              | N/A             | 1 (25)       | 0 (0) <sup>†</sup>           |
| <b>ICM, n (%)</b>                 | N/A              | N/A             | 0 (0)        | 0 (0) <sup>†</sup>           |
| <b>NICM, n (%)</b>                | N/A              | N/A             | 0 (0)        | 0 (0) <sup>†</sup>           |
| <b>Atrial Fibrillation, n (%)</b> | N/A              | N/A             | 0 (0)        | 2 (50) <sup>†</sup>          |
| <b>LV Assist Device, n (%)</b>    | N/A              | N/A             | 0 (0)        | 0 (0) <sup>†</sup>           |
| <b>Hyperlipidemia, n (%)</b>      | N/A              | N/A             | 0 (0)        | 1 (25) <sup>†</sup>          |
| <b>Type 2 Diabetes, n (%)</b>     | N/A              | N/A             | 0 (0)        | 0 (0) <sup>†</sup>           |
| <b>Hypertension, n (%)</b>        | N/A              | N/A             | 2 (50)       | 2 (50) <sup>†</sup>          |
| <b>Atherosclerosis, n (%)</b>     | N/A              | N/A             | 1 (25)       | 2 (50) <sup>†</sup>          |

Table S1: Demographics of subjects in the proteomics study. BAV=bicuspid aortic valve, CKD=chronic kidney disease, LV=left ventricular, ICM=ischemic cardiomyopathy, NICM=non-ischemic cardiomyopathy, SD=standard deviation, TAA=thoracic aortic aneurysm. \*=P<0.01 Young TAA vs. Young Healthy, \$=P<0.01 Aged TAA vs. Young TAA, \*\*=P<0.001 for Young Healthy vs. Aged Healthy, #=P-value is not significantly different between Aged TAA vs. Aged healthy, †=P-value is not significantly different between Aged TAA vs. Young TAA. P-value determined by Mann-Whitney U-test for age and aneurysm diameter and by Fisher's Exact test for comorbidities.

Supplemental Figures

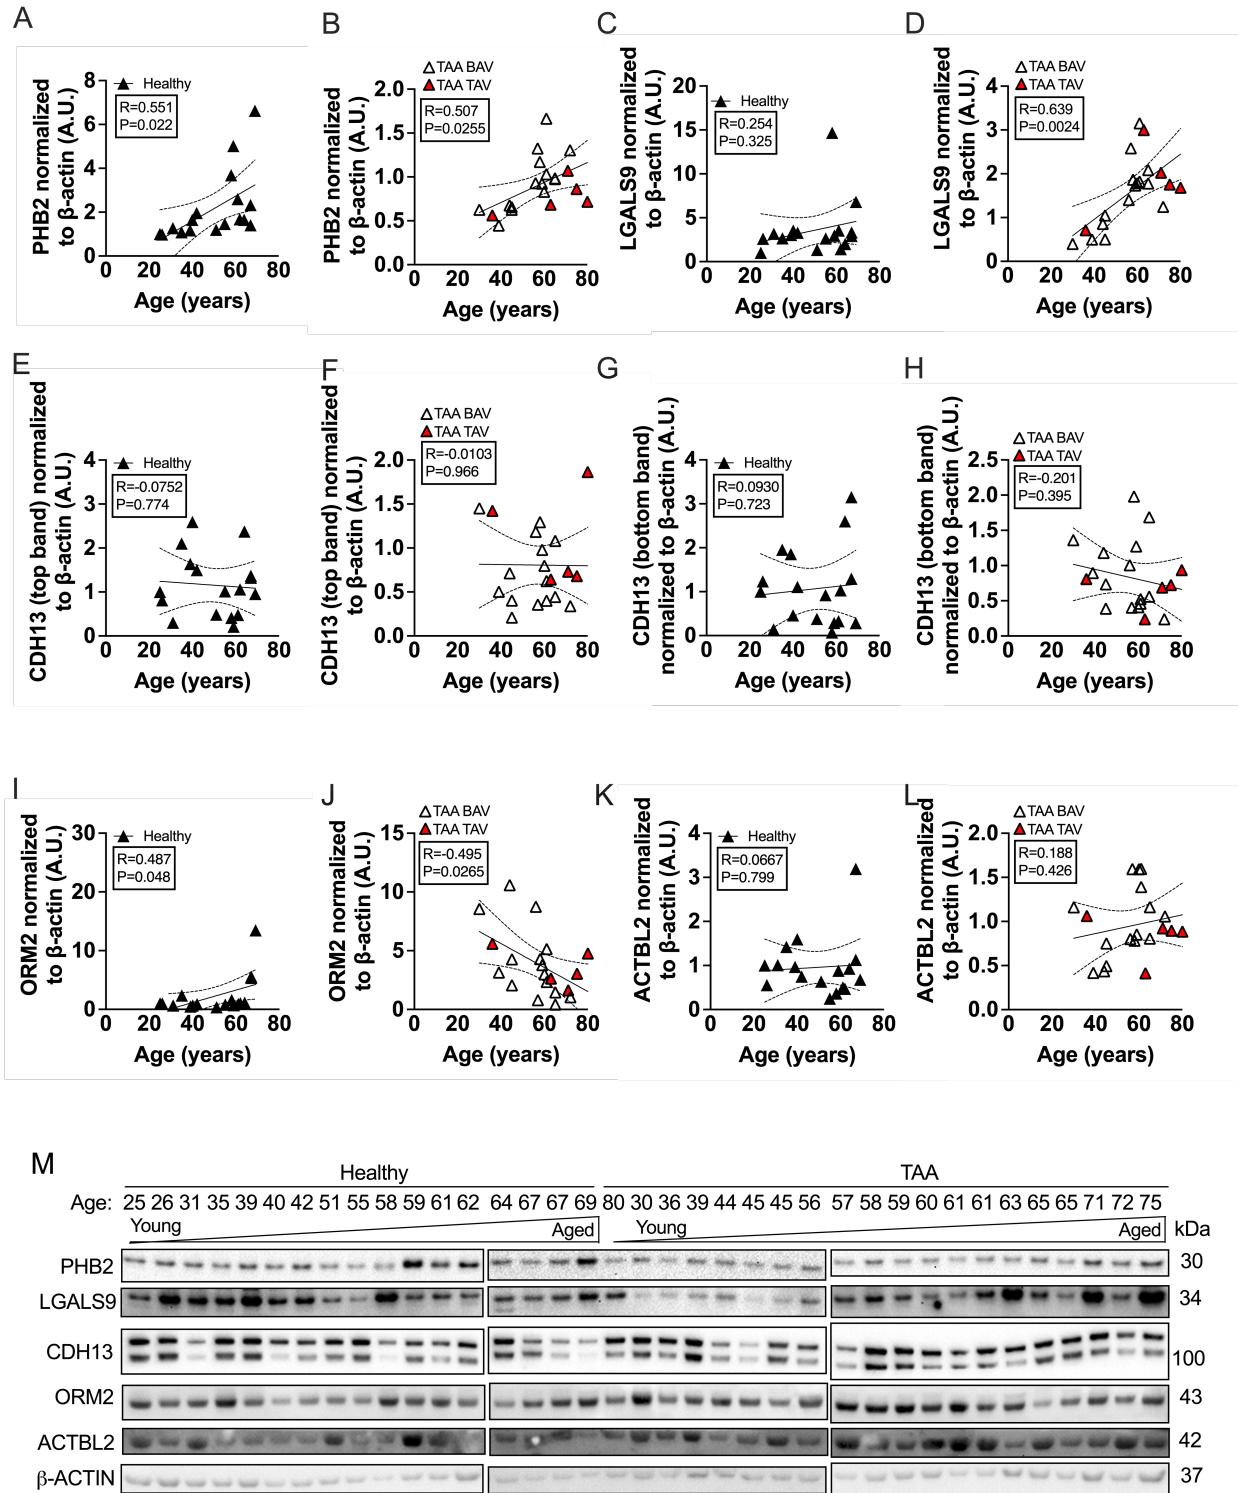

Figure S1. Expression of PHB2, LGALS9, CDH13, ORM2, and ACTBL2 in the aortas of healthy and TAA patients

Aortic lysates from healthy (N = 17) and TAA (N = 20) subjects were immunoblotted against prohibitin 2 (PHB2), galectin 9 (LGALS9), T-cadherin (CDH13), alpha-1 acid glycoprotein 2 (ORM2), Actin beta-like 2 (ACTBL2), and  $\beta$ -actin. The expression of PHB2 (**A-B**), LGALS9 (**C-D**), CDH13 top band (**E-F**), CDH13 bottom band (**G-H**), ORM2 (**I-J**), and ACTBL2 (**K-L**) in the healthy and TAA groups were plotted against age and regression analysis was performed. **M**: All immunoblots for PHB2, LGALS9, CDH13 top band, CDH13 bottom band, ORM2, ACTBL2, and  $\beta$ -Actin along with subject age are shown. Note that the 80-yr old TAA sample was erroneously place out of order. BAV = bicuspid aortic valve (open triangle), TAV = tricuspid aortic valve (red triangle). P values and correlation coefficients represent all data points within each graph.

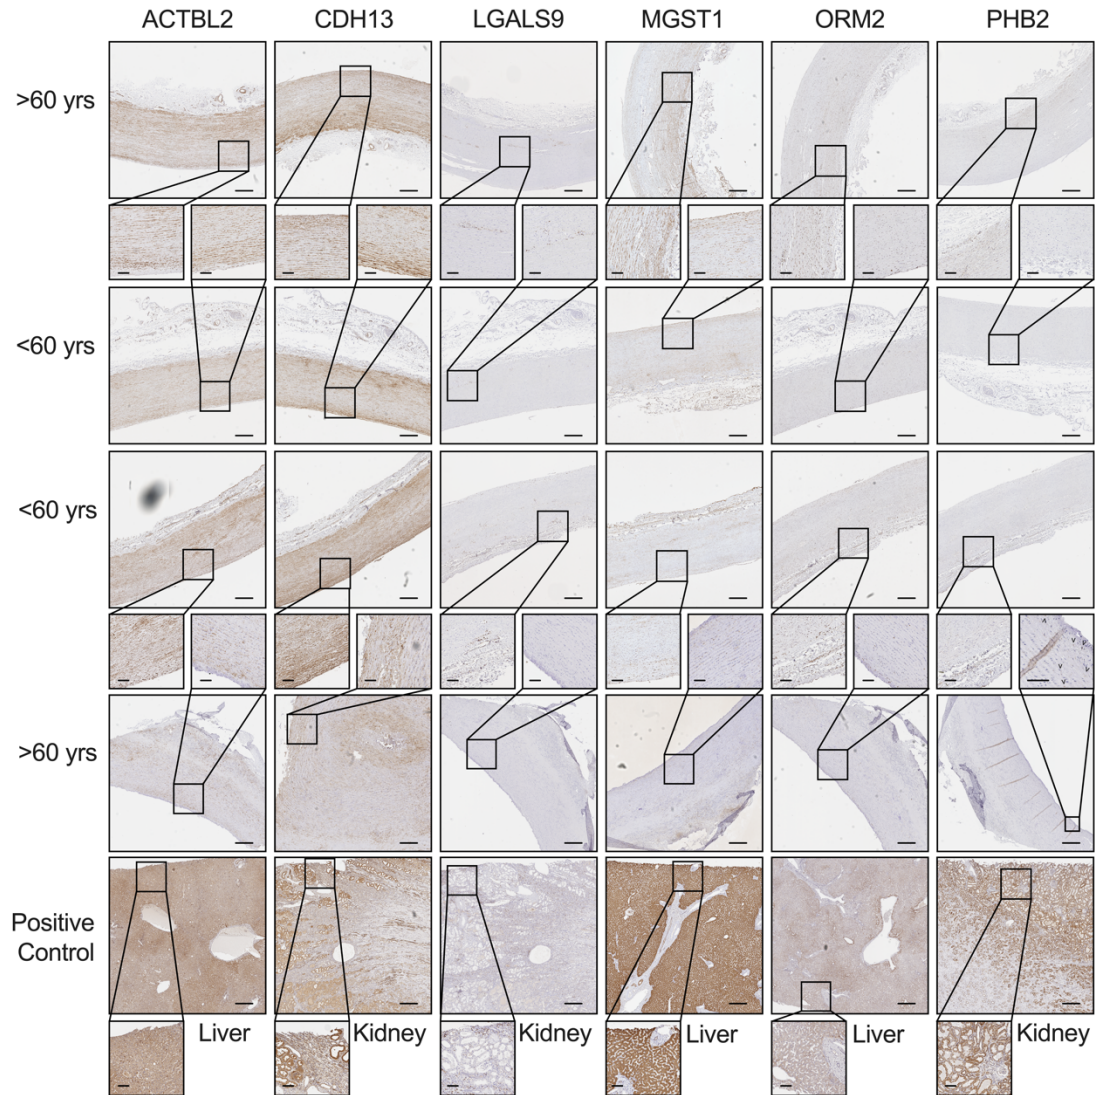

**Figure S2. Immunohistochemistry of ACTBL2, CDH13, LGALS9, MGST1, ORM2, and PHB2 in aortas of young and aged TAA patients**

Formalin-fixed, paraffin-embedded aortic tissues from TAA (N = 4) subjects, and liver and kidney of control subjects were sectioned and stained against actin beta-like 2 (ACTBL2), prohibitin 2 (PHB2), galectin 9 (LGALS9), T-cadherin (CDH13), alpha-1 acid glycoprotein 2 (ORM2), Actin beta-like 2 (ACTBL2), Microsomal glutathione S-transferase 1 (MGST1). Scale bars on large images are all 500 $\mu$ m and scale bars on all insets are 100 $\mu$ m. Please note that specimen 4 has non-specific PHB2 staining where the tissue has folded over. The inset on specimen 4, PHB2 is more enlarged than the others and has arrowheads to demonstrate true positive staining, and the scale bar is 100 $\mu$ m. Besides positive controls, all samples came from ascending thoracic aortic aneurysms in patients with bicuspid aortic valves.

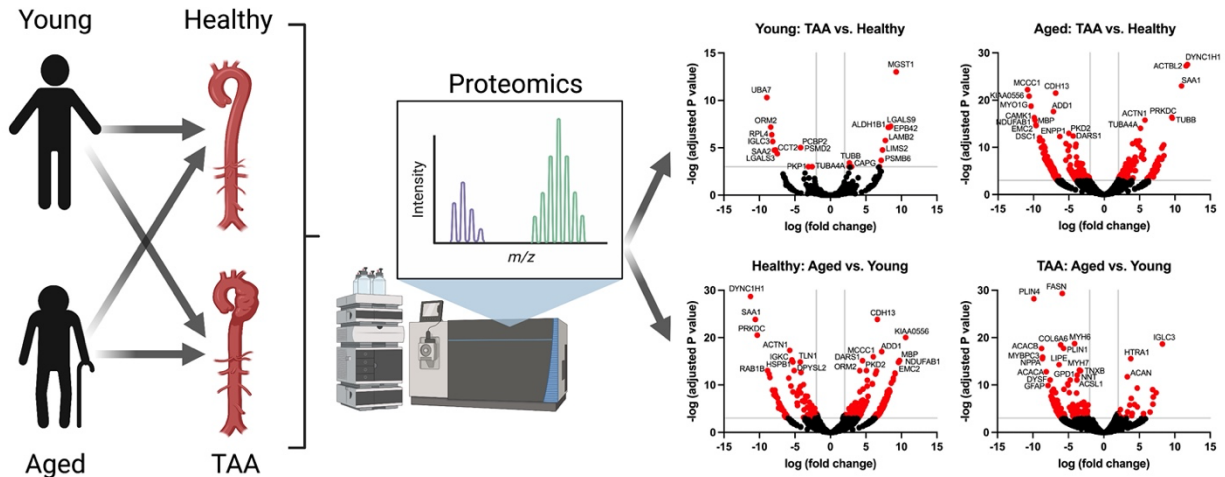

*Figure S3. Graphical Abstract*

We included aortic samples from young and aged individuals and samples from healthy and specimens with thoracic aortic aneurysm (TAA). We performed proteomics analysis of the aortic tissues and performed 4 differential comparisons, generating differential protein expression data and gene ontology and STRING analyses for each, which demonstrated that aging quantitatively and qualitatively impacts the aorta in health and in TAA.
